# Supplementary material
Source: PubMed Central journal article supplement (PMC9430446)
Supplement: web_material_kwab297.pdf [file web_material_kwab297.pdf]

## WEB MATERIAL

### **Racial Residential Segregation in Young Adulthood and Brain Integrity in Middle Age: Can We Learn From Small Samples?**

Adina Zeki Al Hazzouri, Neal Jawadekar, Katrina Kezios, Michelle R. Caunca, Tali Elfassy, Sebastian Calonico, Kiarri N. Kershaw, Kristine Yaffe, Lenore Launer, Martine Elbejjani, Leslie Grasset, Jennifer Manly, Michelle C. Odden, and M. Maria Glymour

**Correspondence to** Dr. Adina Zeki Al Hazzouri, Department of Epidemiology, Columbia University, 722 W. 168<sup>th</sup> Street, New York, NY 10032 (e-mail: az2567@cumc.columbia.edu).

Contents:  
Web Tables 1 and 2

**Web Table 1. Comparison of Baseline Covariates Between Blacks Included and Excluded from the MRI Substudy, CARDIA Study**

| Participant Characteristic                      | Included In or Excluded From the MRI Substudy |      |            |                               |       |            |
|-------------------------------------------------|-----------------------------------------------|------|------------|-------------------------------|-------|------------|
|                                                 | Included ( <i>n</i> = 290)                    |      |            | Excluded* ( <i>n</i> = 2,346) |       |            |
|                                                 | Mean (SD)                                     | No.  | %          | Mean (SD)                     | No.   | %          |
| <b>Sociodemographics at Baseline</b>            |                                               |      |            |                               |       |            |
| Age, years                                      | 24 (4)                                        |      |            | 24 (4)                        |       |            |
| Years of education                              | 13 (2)                                        |      |            | 13 (2)                        |       |            |
| Income <sup>a</sup> , \$1000                    |                                               | 20.5 | (14, 30)   |                               | 30    | (14, 42.5) |
| Married, no. (%)                                |                                               | 47   | 16         |                               | 456   | 19         |
| Women, no. (%)                                  |                                               | 159  | 55         |                               | 1,321 | 56         |
| <b>Clinical Risk Factors at Baseline</b>        |                                               |      |            |                               |       |            |
| Systolic blood pressure (mmHg)                  | 112 (10)                                      |      |            | 111 (11)                      |       |            |
| Body mass index <sup>b</sup>                    | 25 (5)                                        |      |            | 25 (6)                        |       |            |
| Fasting glucose (mg/dL)                         | 82 (15)                                       |      |            | 82 (20)                       |       |            |
| CES-D Score <sup>a</sup>                        |                                               | 9    | (6, 16)    |                               | 8     | (6, 18)    |
| <b>Health Behaviors at Baseline</b>             |                                               |      |            |                               |       |            |
| Current smoker, no. (%)                         |                                               | 82   | 28         |                               | 802   | 34         |
| Physical activity <sup>a</sup> , exercise units |                                               | 324  | (146, 500) |                               | 318   | (159, 549) |
| Mean alcohol consumption <sup>a</sup> (mL)      |                                               | 2    | (0, 13)    |                               | 2     | (0, 12)    |

\*Black participants without MRI data available were excluded from the analysis. Of note, the CARDIA MRI substudy enrolled a total of 719 participants, of whom 290 were Black.

Abbreviation: CES-D, Center for Epidemiologic Studies Depression Scale.

<sup>a</sup> Values are expressed as median (interquartile range).

<sup>b</sup> Weight (kg)/height (m)<sup>2</sup>.

**Web Table 2. Summary Statistics for the  $G_i^*$  Statistic at Each Time Point, CARDIA Study ( $n = 290$ )**

|                    | <b>T0 (1985)</b>     | <b>T1 (1992)</b>     | <b>T2 (1995)</b>     | <b>T3 (2000)</b>     | <b>T4 (2005)</b>     | <b>T5 (2010)</b>     |
|--------------------|----------------------|----------------------|----------------------|----------------------|----------------------|----------------------|
| Mean<br>(SD)       | 5.45 (3.32)          | 4.48 (3.72)          | 3.65 (3.59)          | 3.57 (3.04)          | 3.11 (3.13)          | 2.72 (2.80)          |
| Median<br>(Q1, Q3) | 5.35<br>(2.86, 7.51) | 4.33<br>(1.73, 6.71) | 3.73<br>(0.29, 5.89) | 3.94<br>(1.01, 5.37) | 3.11<br>(0.41, 5.22) | 2.73<br>(0.39, 4.62) |
